# Supplementary material
Source: MDPI journal article supplement (https://www.mdpi.com/1999-4907/14/5/947)
Supplement: s1 [file s1 › forests-2281727-supplementary.pdf]

# Searching for the Optimized Forest Management Maximizing Carbon Sequestration in Mountain Forests Impacted by Natural Disturbances: a Case Study in the Alps

Hana Štraus, Suzana Podvinšek and Matija Klopčič

## Supplementary Material

### *S1: Calculation of carbon sequestration*

In the study, we focused on carbon sequestration in forest only, so it was calculated considering only the change in tree biomass and woody biomass of trees that have died naturally since they remain in forests (equation 1). We did not include harvested timber in the calculation because most of it is removed from the forest and does not represent direct sequestration. Nevertheless, it is important to note that in the long term harvested wood can positively affect the carbon stock on a broader level (i.e., state or EU level) (IPCC, 2003; Thrippleton et al., 2021). Equation 1 was used to calculate carbon sequestration in forests (adapted after Blattert et al., 2018):

$$\Delta C = C_{\text{live trees}, t+n} - C_{\text{live trees}, t} + \sum C_{\text{remaining deadwood}, a} \quad (S1),$$

where  $\Delta C$  is the change in carbon pool between time  $t$  and  $t+n$  ( $t$  C ha<sup>-1</sup>),  $C_{\text{live trees}}$  is the carbon in the above- and below-ground living tree biomass ( $t$  C ha<sup>-1</sup>) and is calculated according to equation S2 (Thrippleton et al., 2021),  $C_{\text{remaining deadwood}}$  is carbon in the deadwood from natural mortality, stumps and harvest residues ( $t$  C ha<sup>-1</sup>) calculated according to equation S3,  $t$  is the start time of the simulation (years),  $n$  is the duration of the simulation (years) and  $a$  is the simulation interval (years).

$$C_{\text{live trees}} = CF * V_{\text{live trees}} * WD * BEF * R \quad (S2),$$

where  $V_{\text{live trees}}$  is aboveground volume of alive trees (m<sup>3</sup> ha<sup>-1</sup>),  $CF$  is species-specific carbon factor,  $WD$  is species-specific wood density (Table S1),  $BEF$  is species-specific biomass expansion factor and  $R$  is species-specific root-shoot expansion factor.

$$C_{\text{remaining deadwood}, a} = CF * WD * ((R * BEF * V_{\text{natural deadwood}, a}) + V_{\text{stumps}, a} + V_{\text{harvest residues}, a}) * e^{-k * (t+n-a)} \quad (S3),$$

$$V_{\text{stumps}, a} = 0,03 * V_{\text{timber}, a} \quad (S4),$$

$$V_{\text{harvest residues}, a} = 0,10 * V_{\text{timber}, a} \quad (S5),$$

where  $V_{\text{natural deadwood}}$  is deadwood volume from natural mortality (m<sup>3</sup> ha<sup>-1</sup>),  $V_{\text{stumps}}$  is volume of tree stumps (m<sup>3</sup> ha<sup>-1</sup>),  $V_{\text{harvest residues}}$  is volume of harvest

residues ( $\text{m}^3 \text{ha}^{-1}$ ) and  $k$  is the indicator of decomposition rate, calculated according to equation 4 (Mackensen et al., 2003)

$$k = \text{dec1} * \text{dec2} * \text{MAT} \quad (\text{S6}),$$

where  $\text{dec1}$  is decomposition factor 1, being 0,0166,  $\text{dec2}$  decomposition factor 2 being 0,093, and  $\text{MAT}$  mean annual temperature ( $^{\circ}\text{C}$ ).

## ***S2: Parameters for calculating the aboveground biomass of live trees***

**Table S1.** Parameters used for calculation of the aboveground biomass of live trees (IPCC, 2003)

|     | Beech | Spruce | Fir  | O. conif. | O. broad. |
|-----|-------|--------|------|-----------|-----------|
| CF  | 0,48  | 0,51   | 0,51 | 0,51      | 0,48      |
| BEF | 1,4   | 1,3    | 1,3  | 1,3       | 1,4       |
| WD  | 0,58  | 0,4    | 0,4  | 0,4       | 0,52      |
| R   | 0,26  | 0,3    | 0,3  | 0,3       | 0,26      |

## **References**

- Blattert, C.; Lemm, R.; Thees, O.; Hansen, J.; Lexer, M.J.; Hanewinkel, M. Segregated versus Integrated Biodiversity Conservation: Value-Based Ecosystem Service Assessment under Varying Forest Management Strategies in a Swiss Case Study. *Ecological Indicators* **2018**, 95, 751–764, doi:10.1016/j.ecolind.2018.08.016.
- IPCC Good Practice Guidance for Land Use, Land-Use Change and Forestry /The Intergovernmental Panel on Climate Change. Ed. by Jim Penman; Penman, J., Ed.; Hayama, Kanagawa, 2003; ISBN 978-4-88788-003-0.
- Mackensen, J., Bauhus, J., Webber, E., 2003. Decomposition rates of coarse woody debris - A review with particular emphasis on Australian tree species. *Australian Journal of Botany* 51, 27-37.
- Thrippleton, T.; Blattert, C.; Bont, L.G.; Mey, R.; Zell, J.; Thürig, E.; Schweier, J. A Multi-Criteria Decision Support System for Strategic Planning at the Swiss Forest Enterprise Level: Coping With Climate Change and Shifting Demands in Ecosystem Service Provisioning. *Front. For. Glob. Change* **2021**, 4, 693020, doi:10.3389/ffgc.2021.693020.
